# Supplementary material
Source: PubMed Central journal article supplement (PMC5358491)
Supplement: jciinsight-2-88864-s001.pdf [file jciinsight-2-88864-s001.pdf]

# Supplemental figure 1

**A**

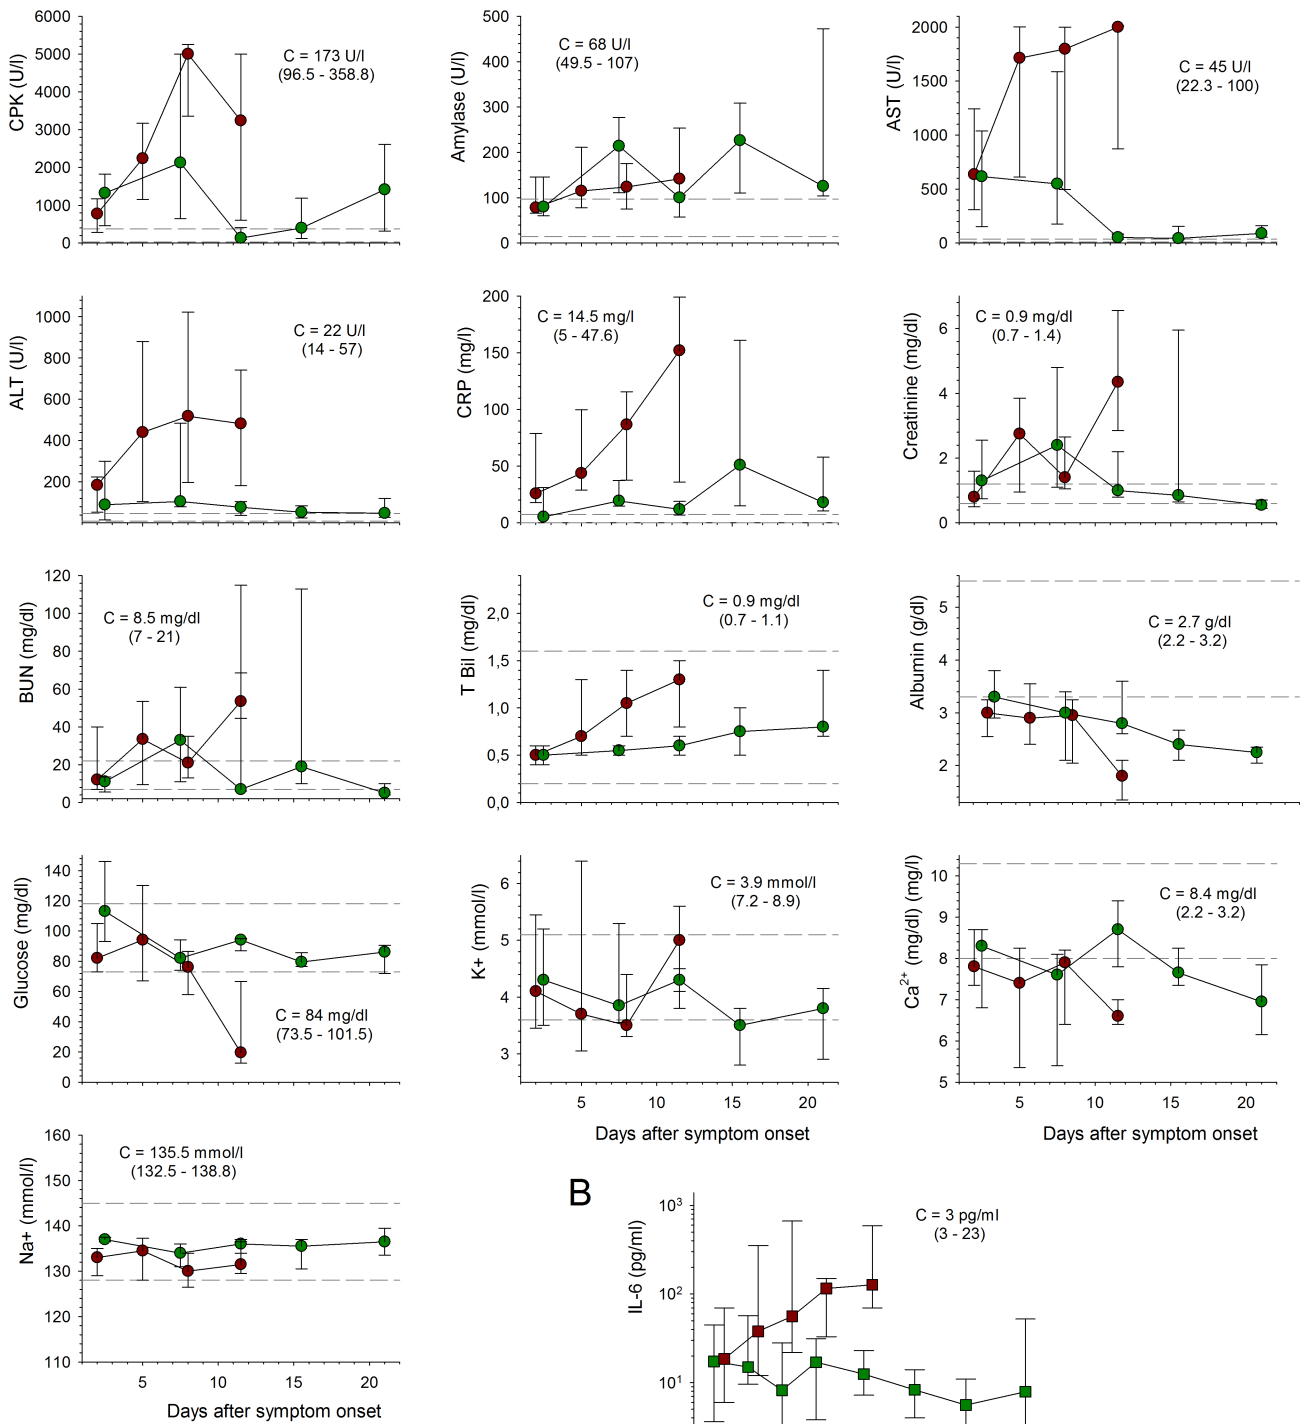

**B**

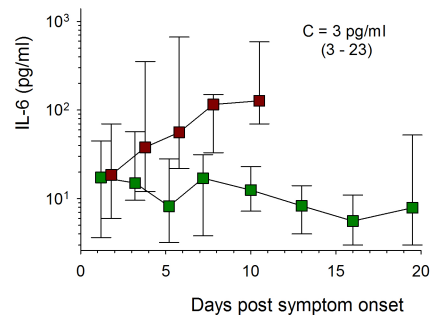

## Supplemental figure 1

A. Levels of CK, amylase, AST, ALT, CRP, creatinine, BUN, T Bil, albumin, glucose, K<sup>+</sup>, Ca<sup>+</sup>, and Na<sup>+</sup> are shown as the median  $\pm$  95% confidence interval (CI) of individual values, according to the number of days after disease onset as follows for fatal EVD patients (red circles) : 1-3 days after disease onset ( $n=9$ , except for albumin :  $n=8$ ), 4-6 days ( $n=10$ , except for albumin, CRP, Ca<sup>+</sup> :  $n=9$  and AST, CK, K<sup>+</sup> :  $n=8$ ), 7-9 days ( $n=5$ , except for albumin, T Bil :  $n=4$  and AST, K<sup>+</sup> :  $n=3$ ) and 10-13 days ( $n=6$ , except for AST :  $n=5$  ; CRP, K<sup>+</sup>, T Bil :  $n=4$  and CK :  $n=3$ ) and for non-fatal EVD patients (green circles) : 1-5 days after disease onset ( $n=5$ , except for CK and K<sup>+</sup> :  $n=4$ ), 6-9 days ( $n=7$ , except for AST, K<sup>+</sup> and T Bil :  $n=6$ ), 10-13 days ( $n=7$ , except for CK :  $n=6$ ), 14-17 days ( $n=12$ , except for CRP :  $n=11$ ) and 18-24 days ( $n=8$ , except for BUN :  $n=7$ ). The median  $\pm$  95% CI of individual values for febrile patients without EVD ( $n=27$ ) is presented for each analyte.

B. Plasma IL-6 concentrations for fatal (red squares) and non-fatal (green squares) EVD cases are shown as the median  $\pm$  95% CI of individual values, according to the number of days after disease onset as follows: 1-2 days after disease onset ( $n=8$  and 6 for fatal cases and survivors, respectively), 3-4 days ( $n=11$  and 7, respectively), 5-6 days ( $n=12$  and 6, respectively), 7-8 days ( $n=7$  and 6, respectively), 9-12 days after disease onset for fatal cases ( $n=5$ ), and 9-11 ( $n=8$ ), 12-14 ( $n=6$ ), 15-17 ( $n=11$ ) and 18-21 ( $n=6$ ) days after disease onset for survivors. The median  $\pm$  95% CI of individual values for febrile patients without EVD ( $n=15$ ) is also presented.
